# Supplementary material for: Rapid detection of hydrazine in a naphthol-fused chromenyl loop and its effectiveness in human lung cancer cells: tuning remarkable selectivity via the reaction altered pathway supported by theoretical studies
Source: Royal Society of Chemistry journal article supplement (doi:10.1039/c4ob01842g), 2014-12-05
Supplement: c4ob01842g1.pdf [file c4ob01842g1.pdf]

## Supporting Information

### **Rapid detection of hydrazine in a naphthol-fused chromenyl loop and its effectiveness in human lung cancer cells: tuning remarkable selectivity *via* the reaction altered pathway supported by theoretical studies**

Shyamaprosad Goswami,<sup>\*a</sup> Avijit Kumar Das,<sup>a</sup> Urmila Saha,<sup>b</sup> Sibaprasad Maity,<sup>a,c</sup> Kalyani Khanra<sup>d</sup> and Nandan Bhattacharyya<sup>d</sup>

<sup>a</sup>Department of Chemistry, Indian Institute of Engineering Science and Technology, Shibpur, West Bengal, India

<sup>b</sup>Jadavpur University, Jadavpur, Kolkata, West Bengal, India

<sup>c</sup>Department of Applied Sciences, Haldia Institute of Technology, Hatiberia, Haldia, West Bengal-721657, India.

<sup>d</sup>Panskura Banamali College, Panskura, India.

### CONTENTS

|                                                                                                  |                |
|--------------------------------------------------------------------------------------------------|----------------|
| <b>1. Calculation of the detection limit.....</b>                                                | <b>S2</b>      |
| <b>2. Evaluation of cytotoxic activity on NCI-H460 cell lines.....</b>                           | <b>S3-S4</b>   |
| <b>3. Kinetics Study.....</b>                                                                    | <b>S5</b>      |
| <b>4. UV–vis absorption spectra of NAC with N<sub>2</sub>H<sub>4</sub> and pH titration.....</b> | <b>S6</b>      |
| <b>5. Application in real water samples.....</b>                                                 | <b>S7</b>      |
| <b>7. Characterization of NAC and N A P .....</b>                                                | <b>S8-S13</b>  |
| <b>8. Fluorescence spectra of NAC with different analytes.....</b>                               | <b>S14-S16</b> |
| <b>9. Theoretical study.....</b>                                                                 | <b>S17-S19</b> |

❖ **Calculation of the detection limit:**

The detection limit (DL) of NAC in emission spectra for  $N_2H_4$  was determined from the following equation<sup>1</sup>:

$$DL = K * Sb1/S$$

Where K = 2 or 3 (we take 3 in this case); Sb1 is the standard deviation of the blank solution; S is the slope of the calibration curve.

From the graph Fig.S<sub>1</sub>, we get slope = 18.27, and Sb1 value is 27.776.

Thus using the formula we get the Detection Limit for  $N_2H_4$  = 4.5 micromolar in emission.

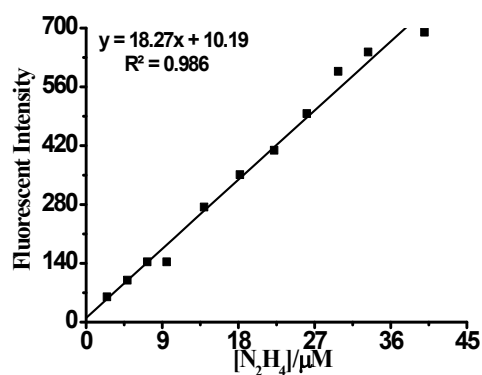

**Figure S<sub>1</sub>:** (a) Changes of fluorescence of NAC( $c = 2 \times 10^{-5}M$ ) as a function of  $[N_2H_4]$  ( $c = 2 \times 10^{-4}M$ ) at 420 nm.

❖ **Evaluation of cytotoxic activity on NCI-H460 cell lines:**

NCI-H460 cells were seeded in 96-well tissue culture plates. After 24 hrs fixed concentration of receptor NAC ( $c = 2 \times 10^{-5} \text{M}$ ) mixed with different concentrations of hydrazine ( $c = 1 \times 10^{-2} \text{M}, 2 \times 10^{-2} \text{M}, 4 \times 10^{-2} \text{M}, 5 \times 10^{-2} \text{M}, 6 \times 10^{-2} \text{M}, 8 \times 10^{-2} \text{M}, 1 \times 10^{-1} \text{M}, 2 \times 10^{-1} \text{M}$ ) were added to the culture medium and incubated for 24 hrs at  $37^\circ\text{C}$ . Non-treated cells were used as control. All the experiments were performed in triplicate. Some of the wells with cells were kept as DMSO and hydrazine control. Incubated cultured cells were then subjected to tetrazolium salt 3-[4, 5-dimethylthiazol-2-yl]-2, 5-diphenyltetrazolium bromide (MTT) colorimetric assay (1). The MTT is used to determine cell viability and cytotoxicity. MTT was added at a final concentration of  $0.5 \text{mg/ml}$  and the cells were incubated at  $37^\circ\text{C}$  for 3.5 hrs. Then formazon dissolved with  $100 \mu\text{L}$  of DMSO in each well. The color changes were measured using a ELISA reader (Robonik, Readwell touch ELISA PLATE analyzer, India). The rate of survival was determined by using the following formulae: Cell viability (%) =  $(1 - \text{ODA}_1 / \text{OD A}_0) / 100$ , where  $A_0$  = Absorbency of control cells and  $A_1$  = Absorbency of treated cells.

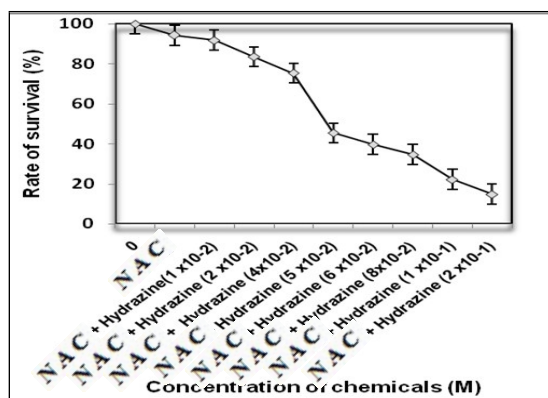

**Figure S<sub>2</sub>:** The rate of survival of cells with different concentrations of  $\text{N}_2\text{H}_4$  added to

NAC-incubated cell. The results are derived from three different experiments (SD<5).

After 5-6 hrs of treatment, fluorescence has been detected. But as the receptor when complexes with hydrazine, the cells started senescing within 3-4 hrs.

❖ **Evaluation of cytotoxic activity on NCI-H460 cell lines with NAC and N<sub>2</sub>H<sub>4</sub> separately:**

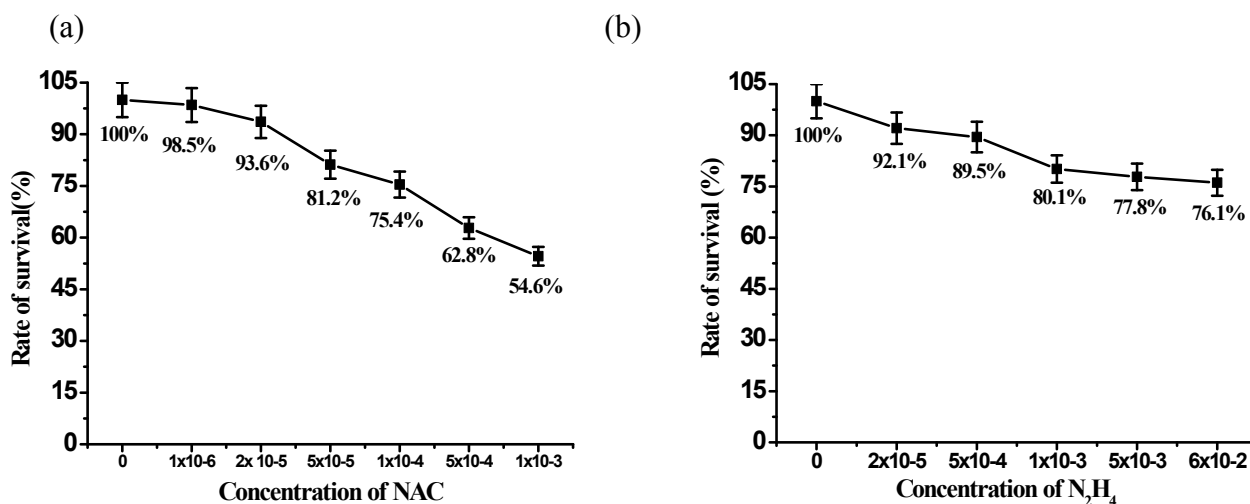

**Figure S<sub>3</sub>:** (a) The rate of survival of cells with different concentrations of NAC. (b) The rate of survival of cells with different concentrations of N<sub>2</sub>H<sub>4</sub>. The results are derived from three different experiments (SD<5).

It had been shown that when the concentration of NAC was 2x10<sup>-5</sup> M and the concentration of Hydrazine was 6x10<sup>-2</sup>M, the survivability of cells was 39.77%. As per the new cytotoxicity data, the survivabilities of cells treated with NAC are 93.6% and cells treated with hydrazine are 76% respectively (Figure S<sub>3</sub>). Therefore, it may be suggested that the survivability of cells decreased due to the additive effect of NAC & Hydrazine adduct (NAP)(Figure S<sub>2</sub>).

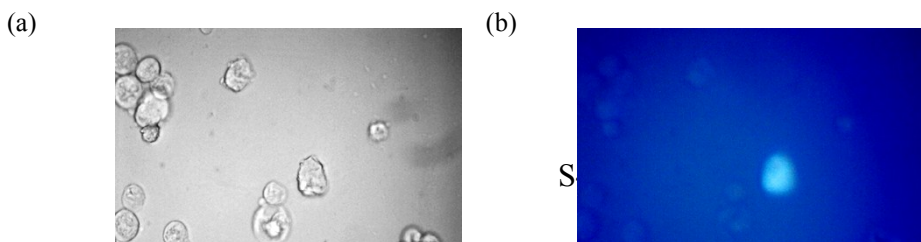

**Figure S<sub>4</sub>**: Fluorescence images of NCI-H460 cells. (a) in presence of NAC ( $c=2 \times 10^{-5}$  M) and Hydrazine ( $c = 1 \times 10^{-4}$  M) (Bright field image). (b) Corresponding dark field image.

❖ **The changes of emission curve of NAC( $c = 2 \times 10^{-5}$  M) at different time interval by addition of  $N_2H_4$  ( $c = 2 \times 10^{-4}$ ) and calculation of first order rate constant:**

Fig S<sub>5</sub> (a) represents the changes of emission at different time interval by addition of  $N_2H_4$ .

From the time vs. emission intensity plot (Fig.S<sub>5</sub>(b)) at fixed wavelength at 420 nm by using first order rate equation we get the rate constant  $K = \text{slope} \times 2.303 = 0.005 \times 2.303 = 1.15 \times 10^{-2} \text{ Sec}^{-1}$ .

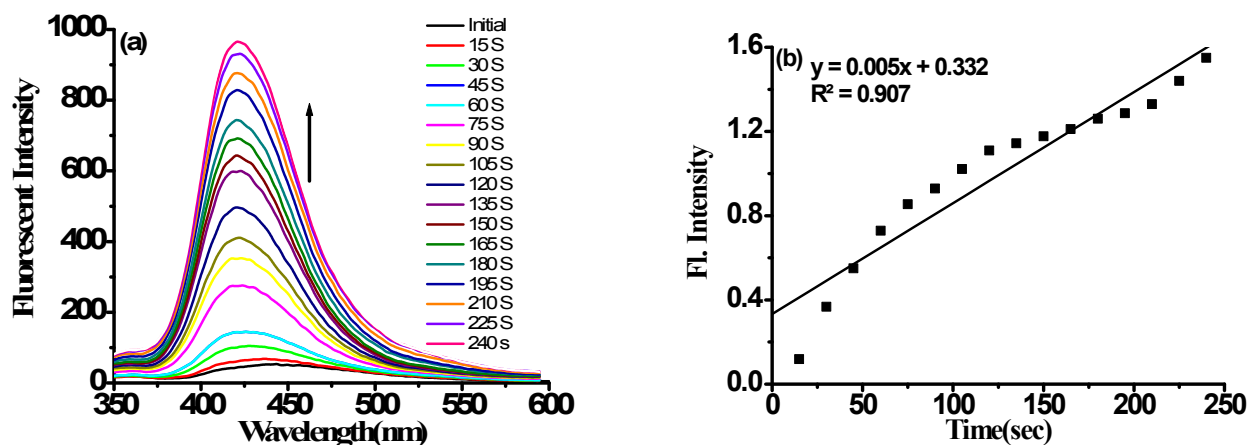

**Figure S<sub>5</sub>**: (a) The changes of emission spectra at different time intervals of NAC in presence of  $N_2H_4$  in  $CH_3CN$ : HEPES buffer solution (v:v, 50:50) at pH 7.4. **Inset:** Different time intervals are shown in the rectangle ('S' denotes Second). (b) The first order rate equation by using Time vs. fluorescent intensity plot at 420 nm.

❖ UV-vis spectra of NAC with  $N_2H_4$ :

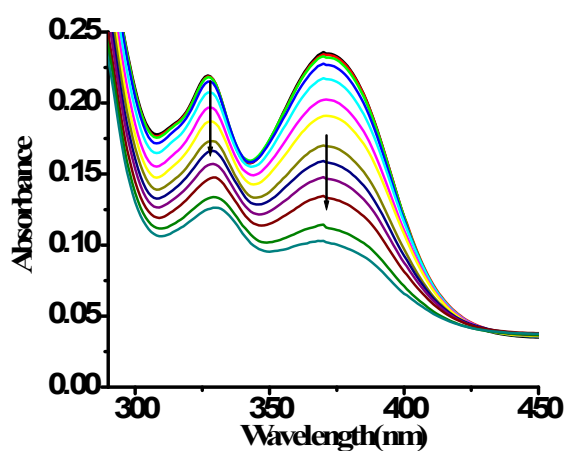

**Figure S<sub>6</sub>:** UV-vis absorption spectra of NAC ( $c = 2.0 \times 10^{-5}$  M) in  $CH_3CN$ :HEPES buffer solution (v:v, 50:50) at pH 7.4. solution upon titration with  $N_2H_4$  ( $c = 2 \times 10^{-4}$  M).

**pH titration:**

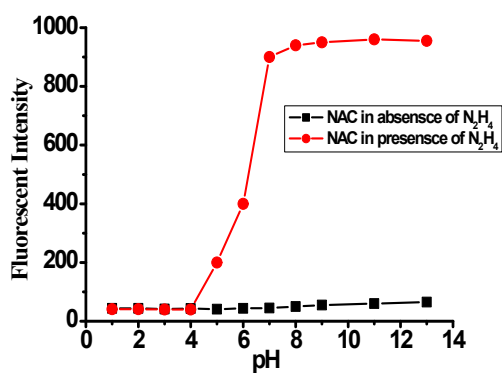

**Figure S<sub>7</sub>:** The variation of fluorescence intensity at 420 nm of NAC in absence and in

presence of  $N_2H_4$  as a function of different pH.

❖ **Application in real water samples:**

At first, NAC (20  $\mu M$ ) solution was prepared by using different water samples in  $CH_3CN: H_2O$  (v:v, 50:50) at pH 7.4 and the solution was treated with different concentration of hydrazine and left for sometime. The fluorescence intensity of each sample was recorded and the comparing curve Fig 5(a) was obtained at wavelength 420 nm.

**Table S1. Determination of hydrazine in water samples:**

| <b>Water samples</b>  | <b>Hydrazine added(<math>\mu M</math>)</b> | <b>Found (<math>\mu M</math>)</b> | <b>Recovery (%)</b> |
|-----------------------|--------------------------------------------|-----------------------------------|---------------------|
| <b>Drinking water</b> | 30                                         | 29.5                              | 98.3                |
|                       | 50                                         | 48.3                              | 96.6                |
|                       | 70                                         | 72                                | 102.8               |
|                       | 30                                         | 28.9                              | 96.3                |

|             |    |      |       |
|-------------|----|------|-------|
| River water | 50 | 49   | 98    |
|             | 70 | 71.5 | 102.1 |

❖ <sup>1</sup>H NMR spectrum (S<sub>8</sub>) of NAC:

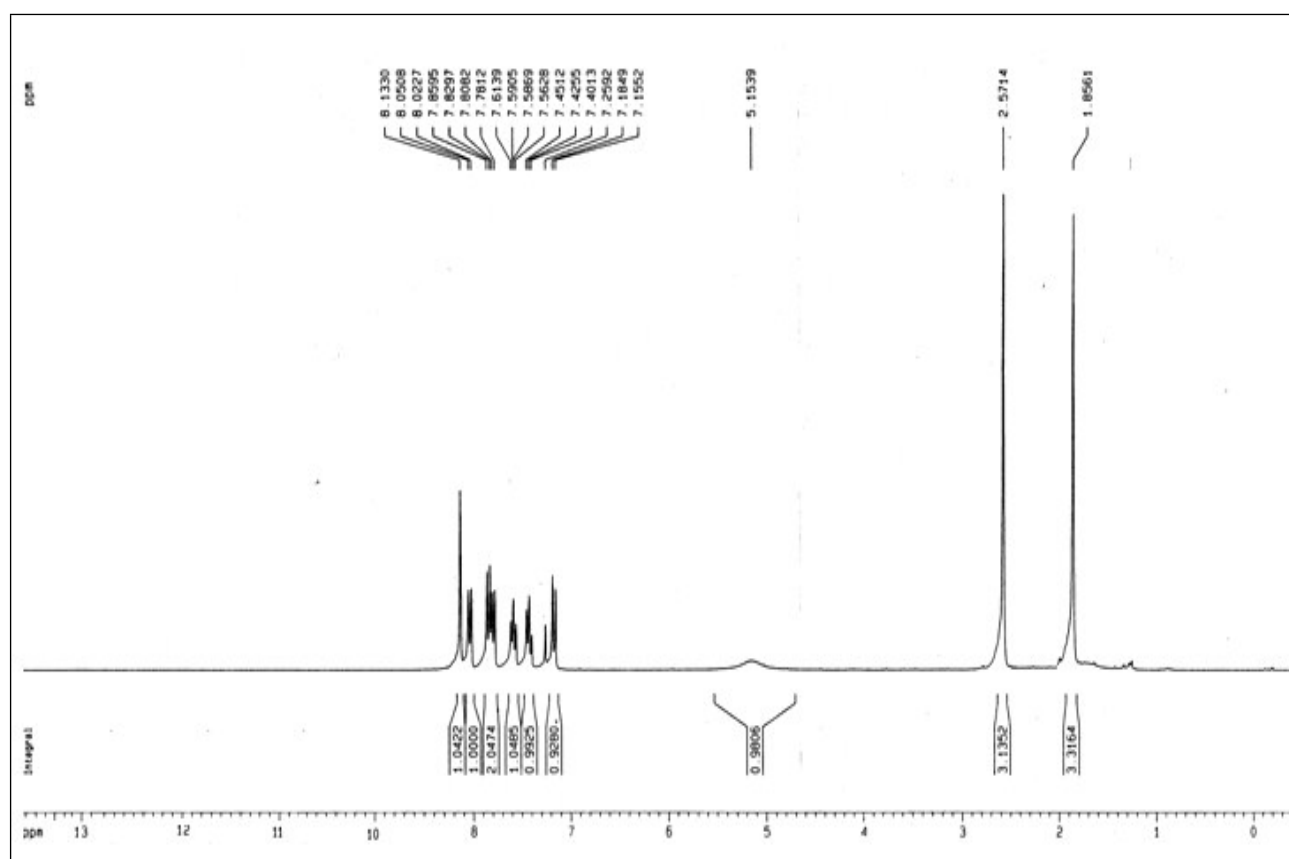



**$^{13}\text{C}$  NMR spectrum (S<sub>9</sub>) of Compound NAC:**

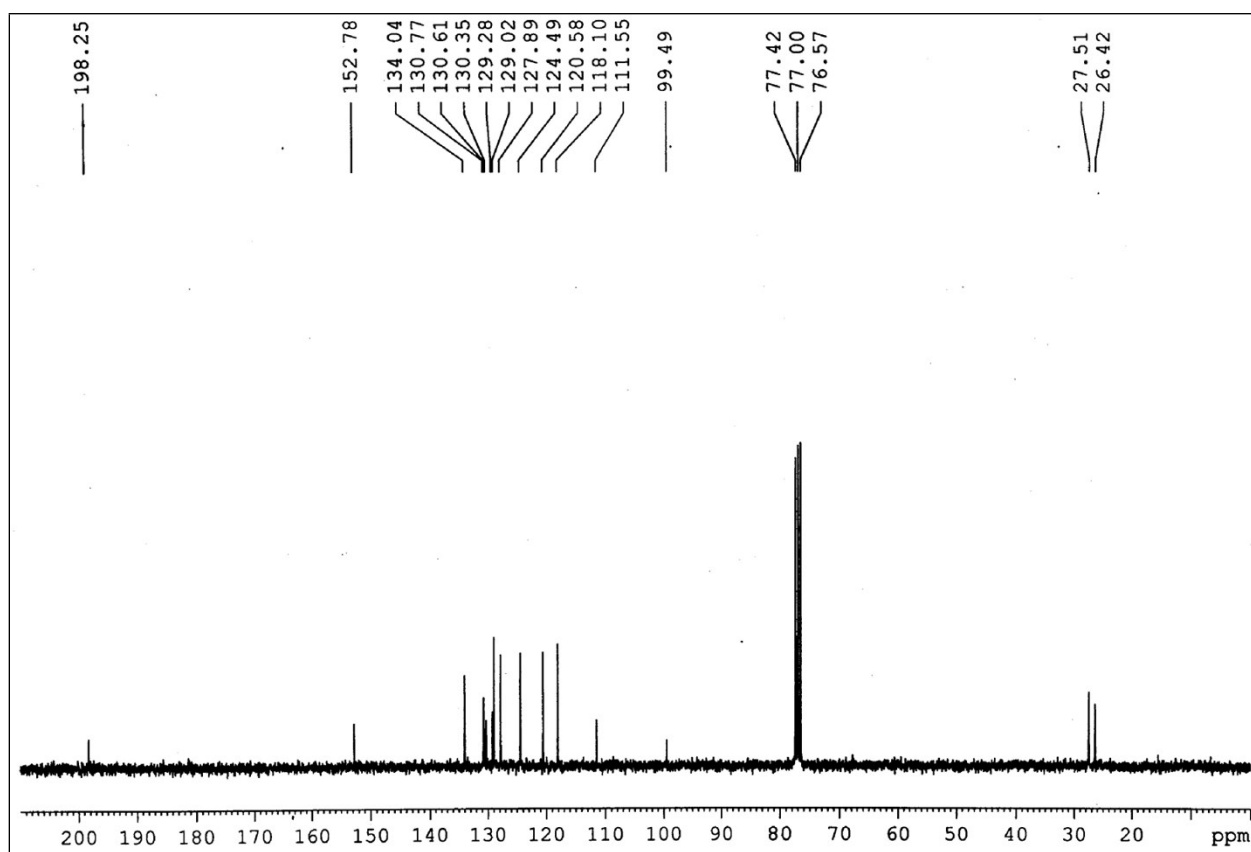

❖ Mass spectrum (S<sub>10</sub>) of Sensor NAC:

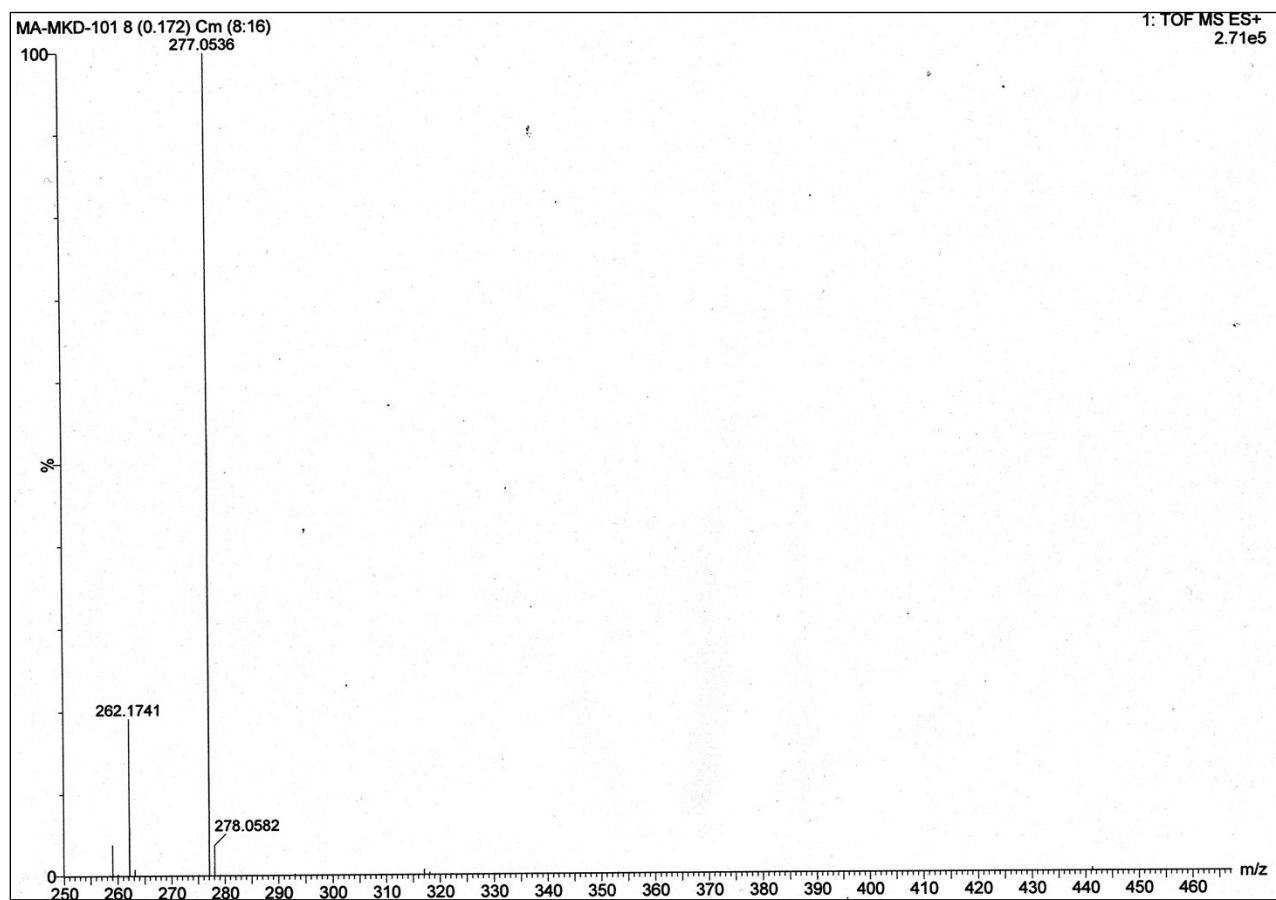

❖  $^1\text{H}$  NMR spectrum ( $S_{11}$ ) of NAC+hydrazine adduct (NAP):

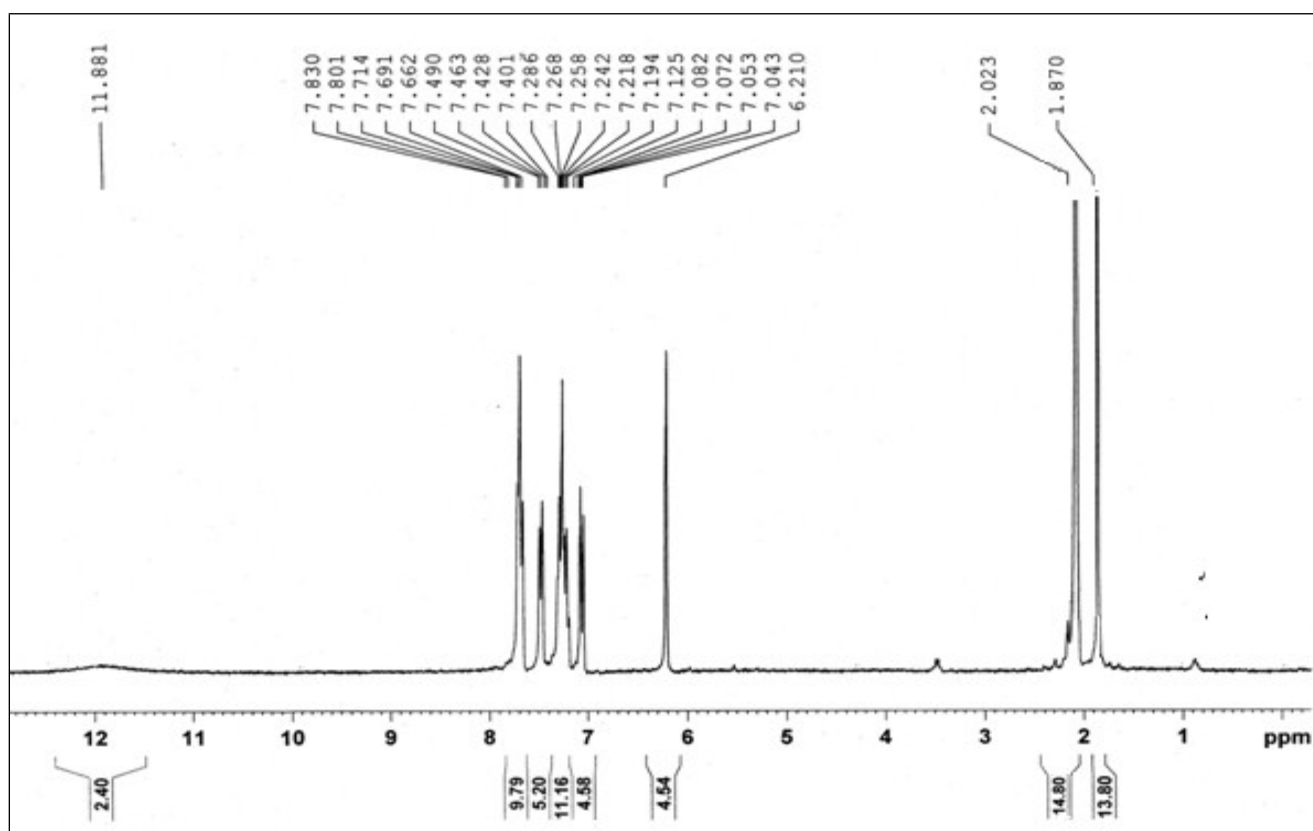

❖  $^{13}\text{C}$  NMR spectrum ( $\text{S}_{12}$ ) of Compound NAP:

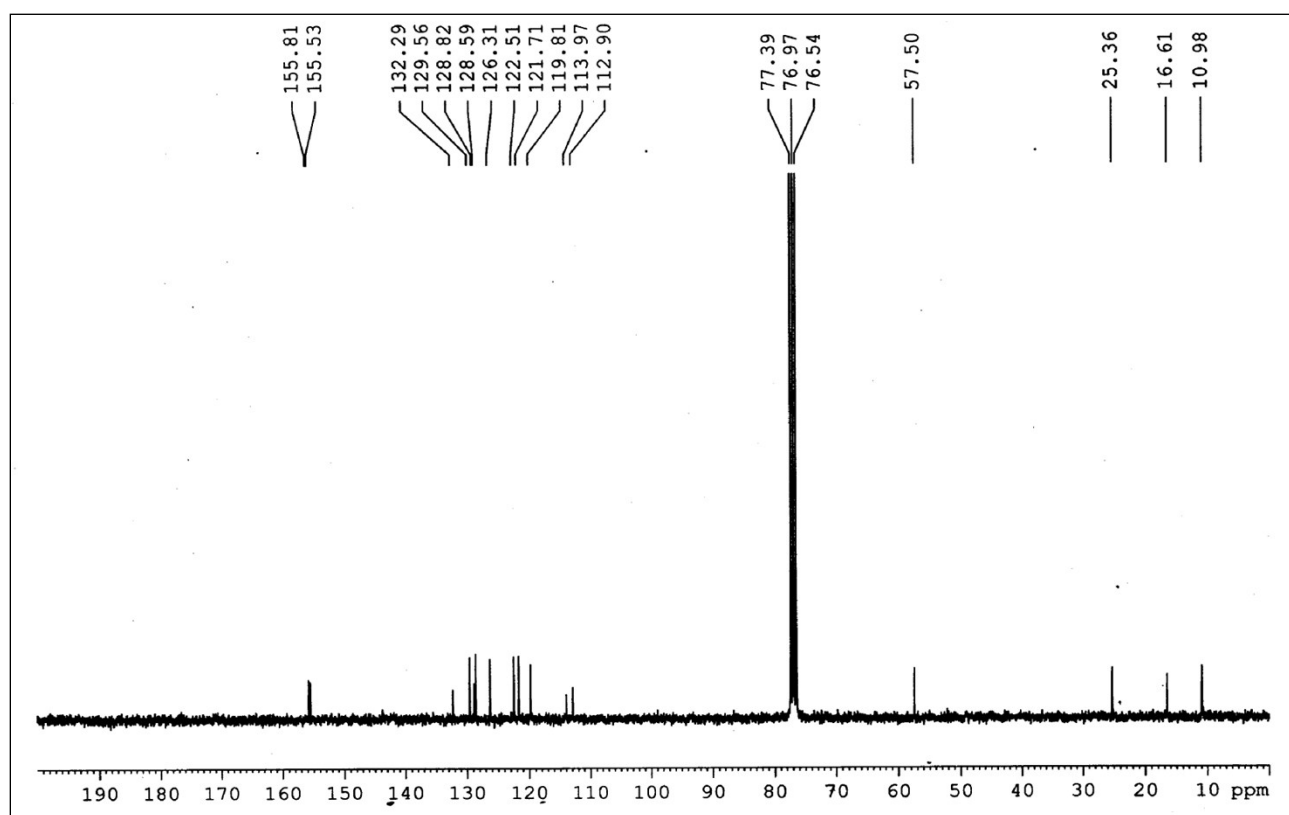

❖ Mass spectrum (S<sub>13</sub>) of Sensor NAP:

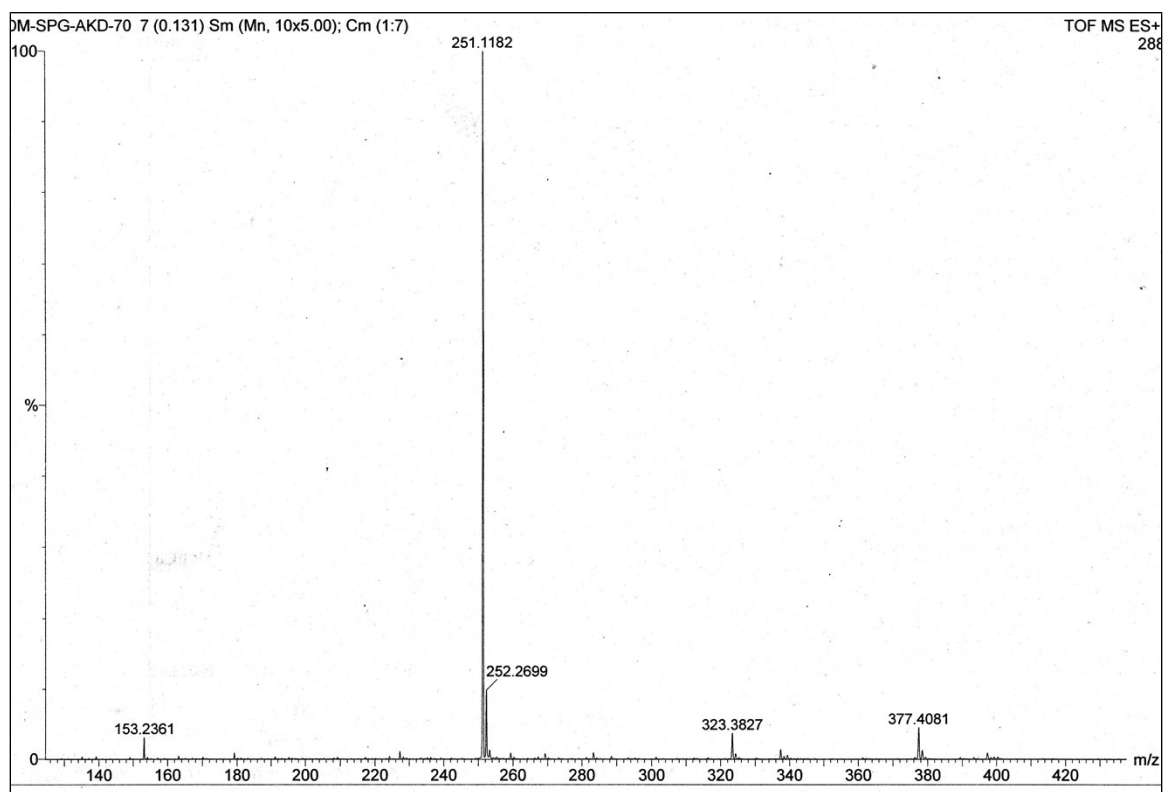

❖ Fluorescence spectra of NAC ( $S_{14}$ )( $c = 2 \times 10^{-5} \text{M}$ ) with different analytes ( $c = 2 \times 10^{-4} \text{M}$ ) in  $\text{CH}_3\text{CN}$ -HEPES buffer (50/50, v/v,  $25^\circ \text{C}$ ) at pH-7.4:

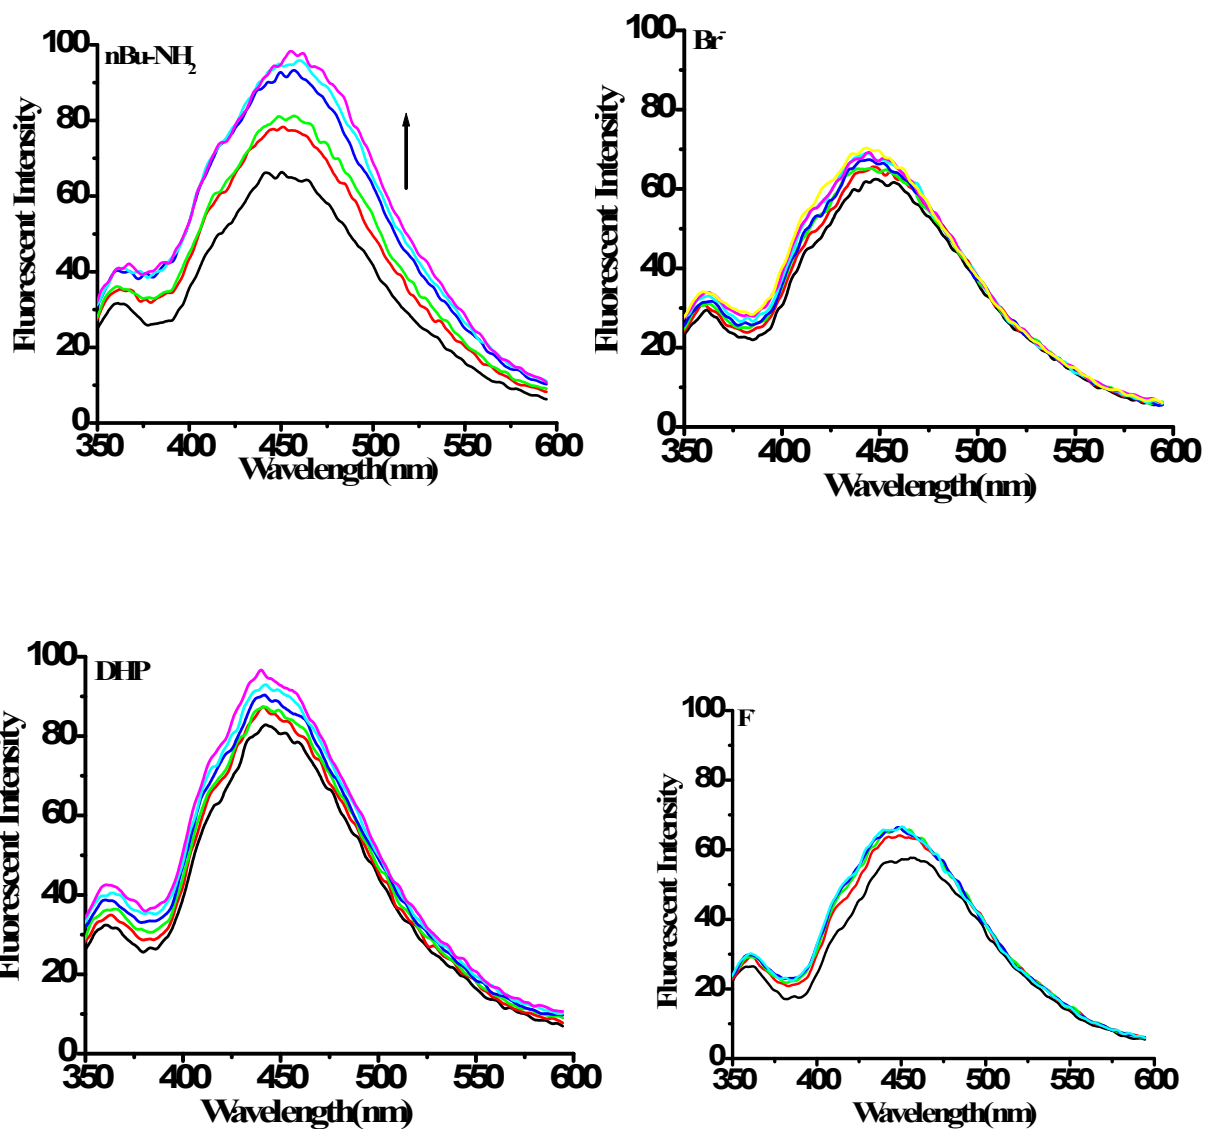

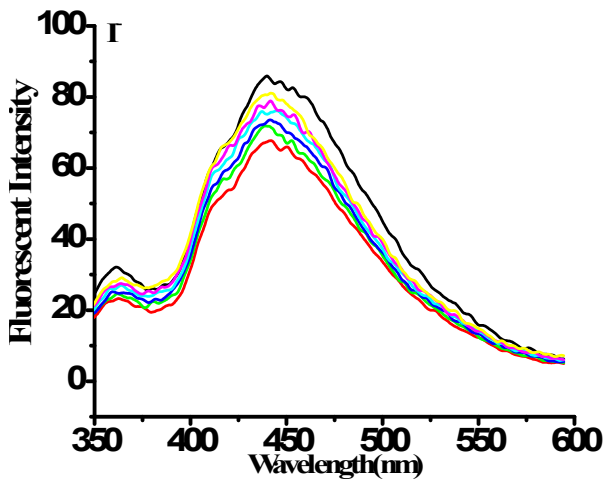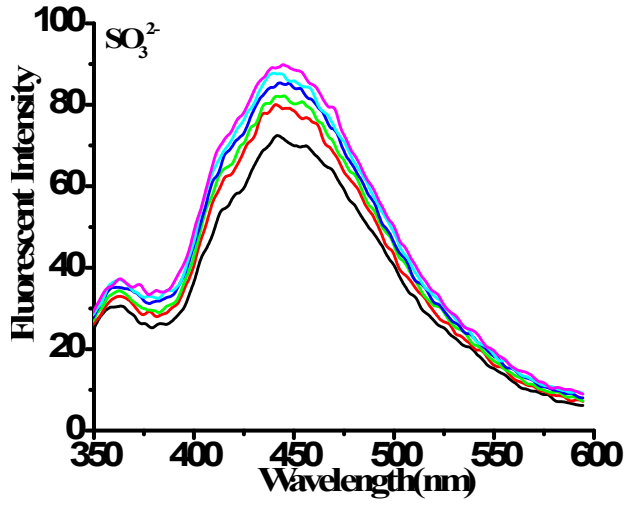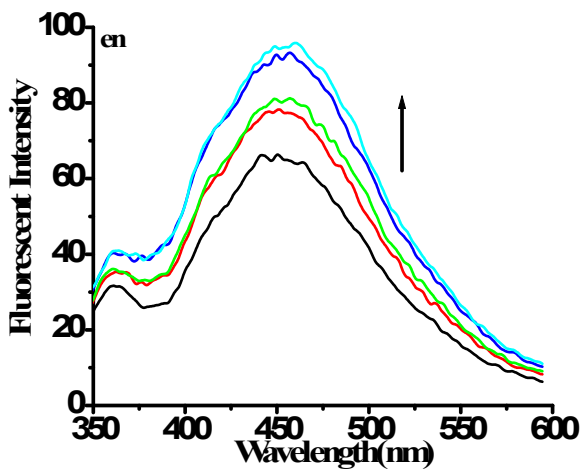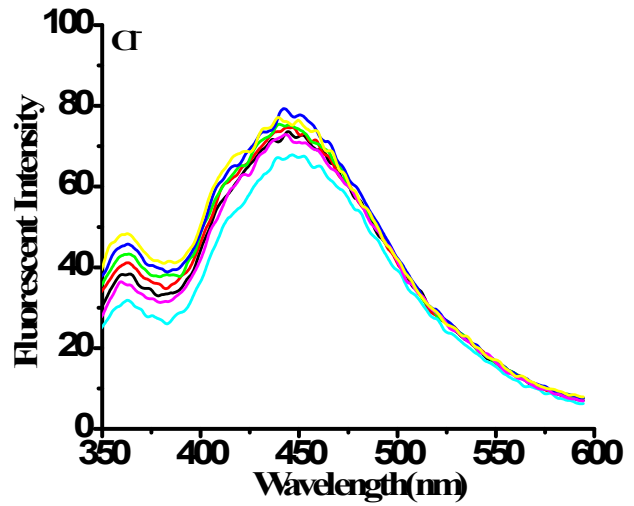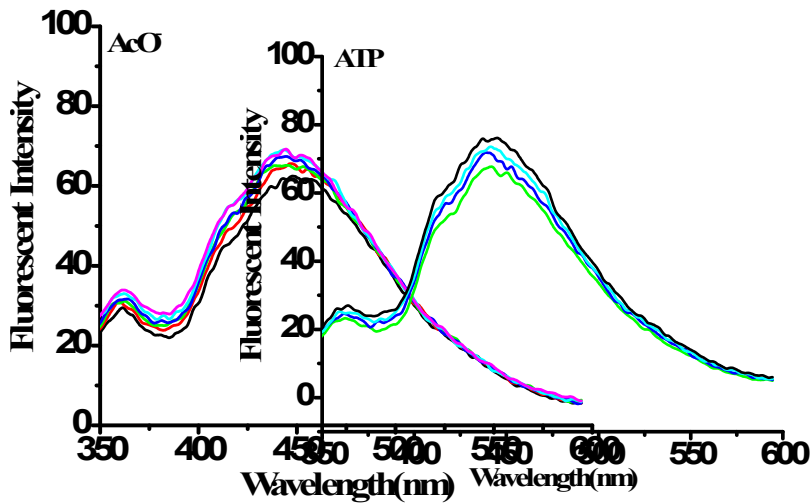

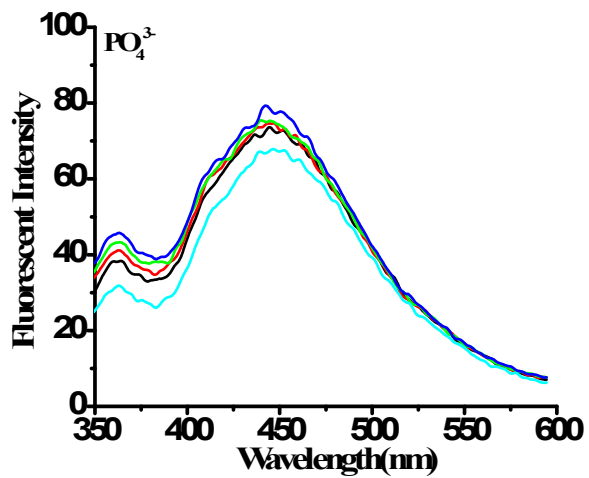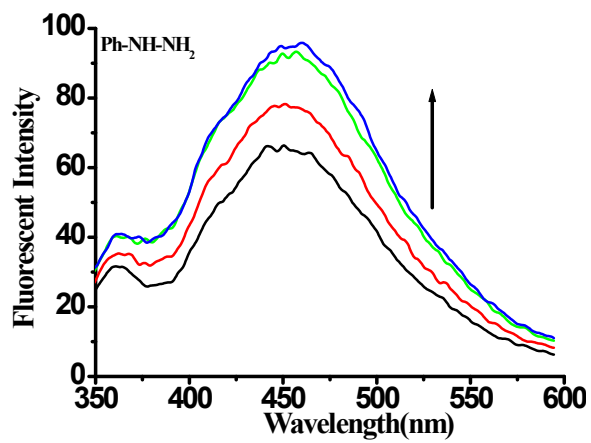



| Electronic transition | Composition               | Excitation energy      | Oscillator strength ( <i>f</i> ) | CI       | Assign | $\lambda_{\text{exp}}$ (nm) |
|-----------------------|---------------------------|------------------------|----------------------------------|----------|--------|-----------------------------|
| $S_0 \rightarrow S_5$ | HOMO-2 $\rightarrow$ LUMO | 3.2748eV<br>(378 nm)   | 0.0809                           | 0.26601  | ILCT   | 372                         |
|                       | HOMO $\rightarrow$ LUMO+1 |                        |                                  | 0.32052  | ILCT   |                             |
|                       | HOMO-3 $\rightarrow$ LUMO |                        |                                  | 0.25961  | ILCT   |                             |
|                       | HOMO-1 $\rightarrow$ LUMO |                        |                                  | 0.46771  | ILCT   |                             |
| $S_0 \rightarrow S_7$ | HOMO-1 $\rightarrow$ LUMO | 3.7220 eV<br>( 333 nm) | 0.0940                           | 0.66071  | ILCT   | 327                         |
|                       | HOMO $\rightarrow$ LUMO+3 |                        |                                  | 0.18316  | ILCT   |                             |
|                       | HOMO-2 $\rightarrow$ LUMO |                        |                                  | -0.15307 | ILCT   |                             |

**Theoretical calculation:**

**Table S<sub>2</sub>** Selected Parameters for the vertical excitation (UV-vis absorptions) of **NAC**; electronic excitation energies (eV) and oscillator strengths (*f*), configurations of the low-lying excited states of **NAC**; based on optimized ground-state geometries (UV-vis absorption) by TDDFT/CPCM method (CH<sub>3</sub>CN used as solvent).

**Table S<sub>3</sub>** Main calculated optical transition for the **NAP** with composition in terms of molecular orbital contribution of the transition, vertical excitation energies, and oscillator strength in acetonitrile solvent based on TDDFT/CPCM method.

| Electronic transition    | Composition                 | Excitation energy     | Oscillator strength ( <i>f</i> ) | CI      | Transition assigned | $\lambda_{\text{exp}}$ (nm) |
|--------------------------|-----------------------------|-----------------------|----------------------------------|---------|---------------------|-----------------------------|
| $S_0 \rightarrow S_{10}$ | HOMO-3 $\rightarrow$ LUMO   | 3.3583 eV<br>(369 nm) | 0.0323                           | 0.41639 | ILCT                | 372                         |
|                          | HOMO-2 $\rightarrow$ LUMO   |                       |                                  | 0.56569 | ILCT                |                             |
| $S_0 \rightarrow S_{13}$ | HOMO-3 $\rightarrow$ LUMO   | 3.7183eV<br>(313 nm)  | 0.0441                           | 0.10983 | ILCT                | 327                         |
|                          | HOMO-3 $\rightarrow$ LUMO+1 |                       |                                  | 0.31383 | ILCT                |                             |
|                          | HOMO-2 $\rightarrow$ LUMO+1 |                       |                                  | 0.46470 | ILCT                |                             |
|                          | HOMO $\rightarrow$ LUMO+1   |                       |                                  | 0.22641 | ILCT                |                             |
|                          | HOMO $\rightarrow$ LUMO+2   |                       |                                  | 0.18321 | ILCT                |                             |

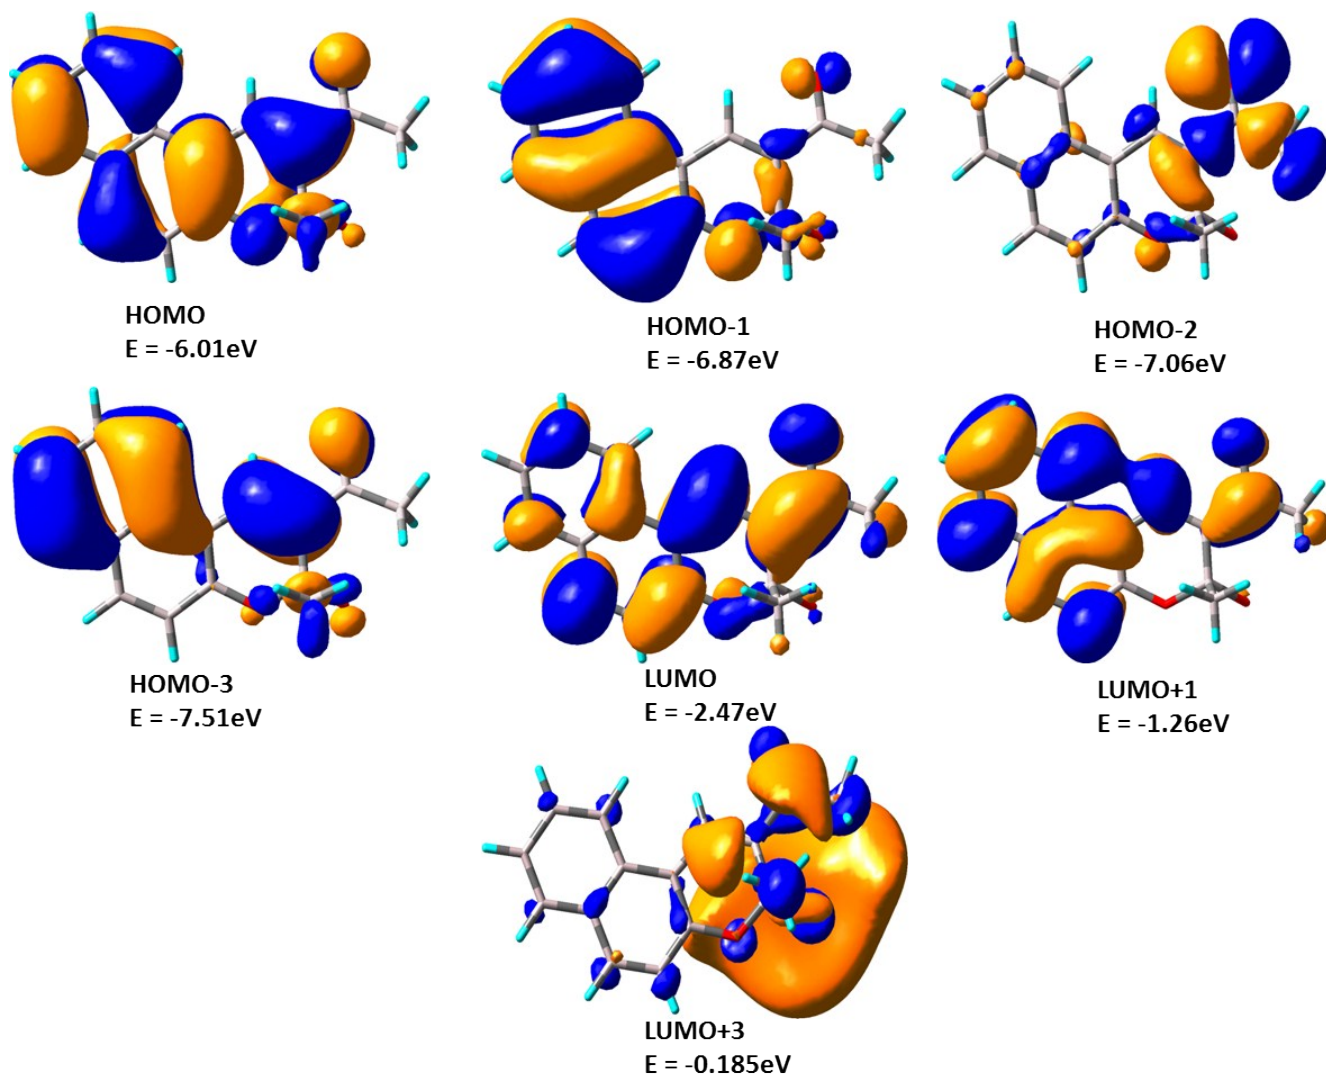

**Figure S15:** Frontier molecular orbitals involved in the UV-vis absorption of NAC.

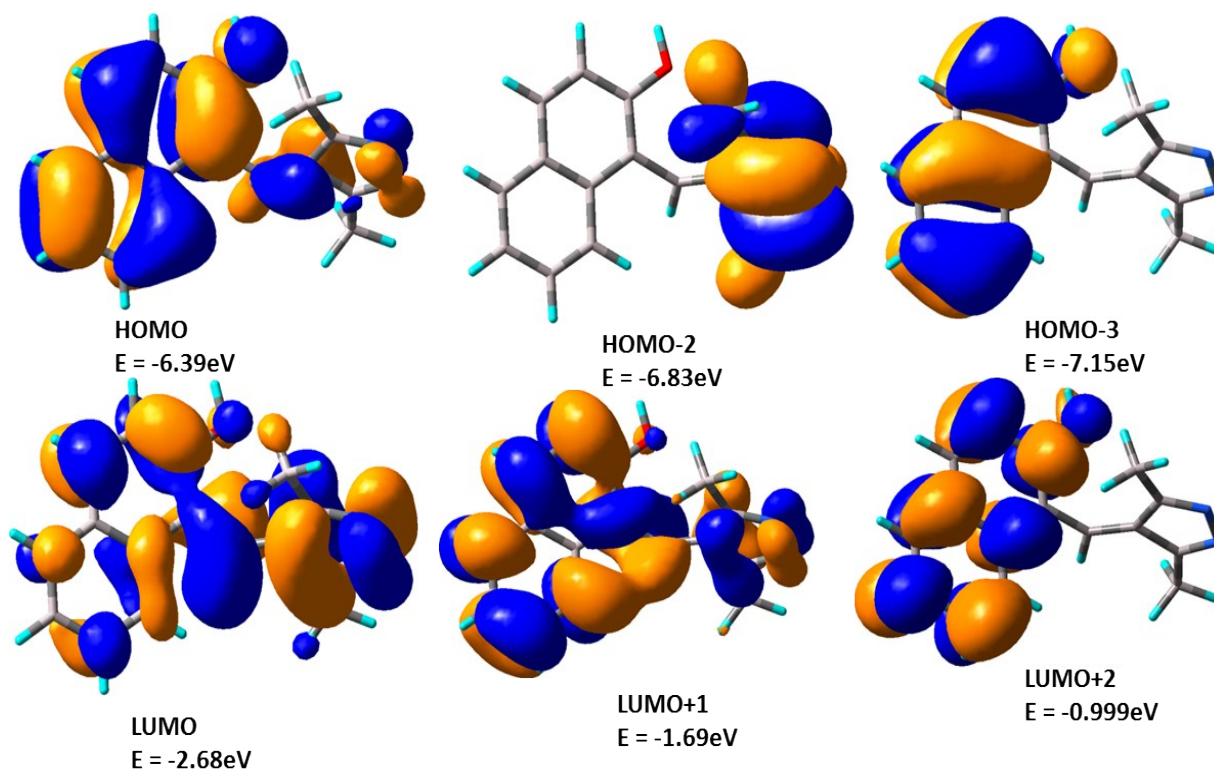

**Figure S16:** Frontier molecular orbitals involved in the UV-vis absorption of NAP.

Ref:

1. M. Shortreed, R. Kopelman, M. Kuhn, B. Hoyland, *Anal. Chem.*, 1996, **68**, 1414. (b) W. Lin,; Yuan, L.; Cao, Z.; Feng, Y.; Long, L. *Chem. Eur. J.* 2009, **15**, 5096. (c) Zhu, M.; Yuan, M.; Liu, X.; Xu, J.; Lv, J.; Huang, C.; Liu, H.; Li, Y.; Wang, S.; Zhu, D. *Org. Lett.* 2008, **10**, 1481-1484.
